# Supplementary material
Source: publisher site journal article supplement (https://www.dovepress.com/article/492902)
Supplement: Supplementary file 1 [file get_supplementary_file.php]

**Supplementary Material**

**Supplementary Table 1** The Primers of Selected Differently Expressed miRNA Candidates

| Rrimers name | F/R (5′-3′ ) | Sequence (5'-3') |
| --- | --- | --- |
| hsa-miR-19b-3p | Forward | GGCTGTGCAAATCCATGCAAAACTGA |
| hsa-miR-27a-3p | Forward | TTCACAGTGGCTAAGTTCCGC |
| hsa-miR-29b-3p | Forward | CGCTAGCACCATTTGAAATCAGTGTT |
| hsa-miR-34a-5p | Forward | TGGCAGTGTCTTAGCTGGTTGT |
| hsa-miR-96-5p | Forward | CGTTTGGCACTAGCACATTTTTGCT |
| hsa-miR-182-5p | Forward | TTTGGCAATGGTAGAACTCACACT |
| hsa-miR-199b-5p | Forward | GCGTCCCAGTGTTTAGACTATCTGTTC |
| hsa-miR-210-3p | Forward | ATACTGTGCGTGTGACAGCGG |
| hsa-miR-301a-3p | Forward | CGCAGTGCAATAGTATTGTCAAAGC |
| hsa-miR-503-5p | Forward | ATATAGCAGCGGGAACAGTTCTGCA |
| hsa-miR-590-3p | Forward | CCGGCCGCTAATTTTATGTATAAGC |
| hsa-miR-1262 | Forward | CGCATGGGTGAATTTGTAGAAGGAT |
| hsa-miR-4772-3p | Forward | CCTGCAACTTTGCCTGATCAGA |
| U6 | Forward | GGAACGATACAGAGAAGATTAGC |
| U6 | Reverse | TGGAACGCTTCACGAATTTGCG |

**Supplementary Table 2** miRNA Expression Profile of Septic Shock Compared to Healthy Controls

| miRNA ID | *P* Value | FDR | log2FC | regulated |
| --- | --- | --- | --- | --- |
| hsa-let-7a-3p | 0.002066118 | 0.256641383 | 3.881867655 | up |
| hsa-let-7f-2-3p | 0.003326329 | 0.334935447 | 3.792886263 | up |
| hsa-let-7i-5p | 0.023237289 | 0.551586263 | 2.025474434 | up |
| hsa-miR-106a-5p | 0.017454655 | 0.462960929 | 1.906560243 | up |
| hsa-miR-10a-5p | 0.009743005 | 0.385407846 | -1.777977035 | down |
| hsa-miR-10b-5p | 0.00962537 | 0.385407846 | -1.777995382 | down |
| hsa-miR-1262 | 0.023680214 | 0.551586263 | 2.361360742 | up |
| hsa-miR-1275 | 5.32483E-06 | 0.001851974 | -4.425425731 | down |
| hsa-miR-142-5p | 0.034269122 | 0.578134415 | 2.065042941 | up |
| hsa-miR-145-3p | 0.045332404 | 0.65135714 | 1.743079405 | up |
| hsa-miR-150-3p | 2.03692E-07 | 9.28242E-05 | -4.389949804 | down |
| hsa-miR-150-5p | 6.03765E-05 | 0.013124332 | -3.078642305 | down |
| hsa-miR-155-5p | 0.009139369 | 0.385407846 | -1.647780108 | down |
| hsa-miR-15b-3p | 0.005686473 | 0.366151431 | 2.722526057 | up |
| hsa-miR-16-2-3p | 0.047435375 | 0.659920943 | 2.066717329 | up |
| hsa-miR-17-3p | 0.008750112 | 0.385407846 | 2.417642776 | up |
| hsa-miR-17-5p | 0.020910652 | 0.527009043 | 1.846880043 | up |
| hsa-miR-182-5p | 4.46217E-10 | 3.87986E-07 | 7.542020066 | up |
| hsa-miR-183-5p | 3.58596E-10 | 3.87986E-07 | 8.189047412 | up |
| hsa-miR-18a-5p | 0.034509152 | 0.578134415 | 1.867701596 | up |
| hsa-miR-18b-5p | 0.034575031 | 0.578134415 | 1.867697623 | up |
| hsa-miR-192-5p | 0.030229138 | 0.56812463 | 1.961832077 | up |
| hsa-miR-193a-5p | 0.040016712 | 0.60946558 | -1.973258357 | down |
| hsa-miR-199b-5p | 0.00565361 | 0.366151431 | 3.310201249 | up |
| hsa-miR-19a-3p | 0.011848443 | 0.40834443 | 3.068744201 | up |
| hsa-miR-19b-3p | 0.011975599 | 0.40834443 | 3.062263228 | up |
| hsa-miR-21-5p | 0.014832328 | 0.4525161 | 2.372914294 | up |
| hsa-miR-210-3p | 5.85121E-05 | 0.013124332 | 5.236574962 | up |
| hsa-miR-218-5p | 0.045696131 | 0.65135714 | 1.896510279 | up |
| hsa-miR-219a-5p | 0.008764355 | 0.385407846 | 3.761042018 | up |
| hsa-miR-2355-3p | 0.025152076 | 0.563444567 | 2.117509412 | up |
| hsa-miR-27a-3p | 0.007064375 | 0.377554096 | 2.96765351 | up |
| hsa-miR-27b-3p | 0.00728999 | 0.377554096 | 2.947166345 | up |
| hsa-miR-29a-3p | 0.047423336 | 0.659920943 | 1.938822745 | up |
| hsa-miR-29b-3p | 0.043284348 | 0.637893912 | 1.988266944 | up |
| hsa-miR-29c-3p | 0.049116481 | 0.664165767 | 1.917788597 | up |
| hsa-miR-301a-3p | 0.028577141 | 0.564723282 | 2.111855298 | up |
| hsa-miR-30b-5p | 0.023583361 | 0.551586263 | 2.066997877 | up |
| hsa-miR-342-3p | 3.4003E-05 | 0.009855215 | -2.80748116 | down |
| hsa-miR-34a-5p | 0.000630703 | 0.099708406 | 3.858112356 | up |
| hsa-miR-374a-3p | 0.026064477 | 0.563444567 | 3.592358894 | up |
| hsa-miR-423-5p | 0.040654403 | 0.60946558 | -1.484172697 | down |
| hsa-miR-424-5p | 0.035961494 | 0.589972055 | 2.563169482 | up |
| hsa-miR-4772-3p | 0.007920407 | 0.377554096 | 2.75923846 | up |
| hsa-miR-503-5p | 0.000363752 | 0.070284931 | 3.238876744 | up |
| hsa-miR-582-3p | 0.017273906 | 0.462960929 | 3.514129698 | up |
| hsa-miR-582-5p | 0.049268191 | 0.664165767 | 2.775592243 | up |
| hsa-miR-590-3p | 0.00975155 | 0.385407846 | 2.921507786 | up |
| hsa-miR-590-5p | 0.033559793 | 0.578134415 | 3.115980301 | up |
| hsa-miR-629-3p | 0.046228106 | 0.65358274 | 1.782655199 | up |
| hsa-miR-7-5p | 0.010952984 | 0.40834443 | 2.776178077 | up |
| hsa-miR-9-3p | 0.01612949 | 0.462960929 | 1.90266048 | up |
| hsa-miR-9-5p | 0.002665867 | 0.293326562 | 2.745343128 | up |
| hsa-miR-96-5p | 2.13512E-07 | 9.28242E-05 | 7.834531157 | up |
| hsa-miR-99b-3p | 0.005686998 | 0.366151431 | 2.985300057 | up |

**Supplementary Table 3** Comparison of miRNA Expression Profiles in Patients with Septic Shock on Day 1 and Day 3.

| miRNA ID | *P* Value | FDR | log2FC | regulated |
| --- | --- | --- | --- | --- |
| hsa-miR-1306-5p | 0.001389266 | 1 | -7.687363653 | down |
| hsa-miR-1827 | 0.047373487 | 1 | -2.543246659 | down |
| hsa-miR-193a-5p | 0.037408796 | 1 | -2.757441253 | down |
| hsa-miR-34c-5p | 0.025333863 | 1 | -3.078367078 | down |
| hsa-miR-382-5p | 0.021211222 | 1 | -3.525098429 | down |
| hsa-miR-432-5p | 0.047386753 | 1 | -2.871984016 | down |
| hsa-miR-485-3p | 0.028699135 | 1 | -4.313295863 | down |
| hsa-miR-486-5p | 0.008582768 | 1 | -3.870057456 | down |
| hsa-miR-582-3p | 0.043059936 | 1 | -2.665316224 | down |
| hsa-miR-6089 | 0.016595151 | 1 | -4.637468367 | down |
| hsa-miR-96-5p | 0.012253912 | 1 | 2.699594561 | up |

**Supplementary Table 4** Demographic and Clinical Details of Non-ARDS and S-ARDS

| Parameters | Non-ARDS  n,32 | S-ARDS  n,52 | *P value* |
| --- | --- | --- | --- |
| Age, years | 58 (53-63) | 58 (43-65) | 0.960 |
| Male sex, n(%) | 22 (68.75) | 41 (80.77) | 0.299 |
| Arterial hypertension, n(%) | 11 (34.375) | 19 (36.54) | 0.841 |
| Diabetes mellitus, n(%) | 5 (15.625) | 5 (9.615) | 0.409 |
| Cerebrovascular disease, n(%) | 1 (3.125) | 4 (7.69) | 0.390 |
| Lung, n(%) | 0 (0) | 52 (100) | <0.001 |
| Abdominal, n(%) | 7 (21.875) | 11 (21.154) | 0.938 |
| Skin and soft tissue, n(%) | 2 (6.25) | 4 (7.69) | 0.803 |
| Other, n(%) | 2 (6.25) | 1 (1.92) | 0.299 |
| Use of mechanical ventilation, n(%) | 27 (84.375) | 40 (76.92) | 0.409 |
| PaO2/FiO2, mmHg | 382 (336.5-463) | 181 (120-222) | <0.001 |
| Mechanical ventilation duration, days | 1.5 (1-8) | 3 (1-8) | 0.595 |
| MAP, mmHg | 82.83 ± 18.70 | 84.57 ± 24.06 | 0.796 |
| Lactate, mmol/L | 1.62 (1.15-2.42) | 2.93 (1.63-4.75) | 0.014 |
| PCT, ng/ml | 4.36 (1.29-18.93) | 5.54 (1.02-24.1) | 0.989 |
| CRP, mg/L | 76.43 (13.23-134.54) | 97.76 ( 30.7-168.43) | 0.258 |
| WBC,10 12/L | 13.67 ± 4.69 | 13.9 ± 7.39 | 0.786 |
| Hemoglobin, g/L | 84.60 ± 30.92 | 104 ± 37.1 | 0.079 |
| Platelet, 109/L | 167 (60.75-270) | 178 (43-261 ) | 0.635 |
| proBNP, pg/ml | 6920.5 ( 772.25-26876.5) | 3459 (1403-11361) | 0.362 |
| PT, s | 13.35 (11.80-16.45) | 13.8 (12.2-17.1) | 0.167 |
| APTT, s | 34.45 ( 30.35-39.5) | 32.2 (27.7-37.8) | 0.719 |
| Fibrinogen, g/L | 4.28 ± 1.79 | 4.10 ± 1.72 | 0.408 |
| TB,umol/L | 14.8 (11-18.35) | 17.9 ( 9.7-40.5) | 0.235 |
| Albumin, g/L | 30.65 (27.8-35.6) | 29.9 (26.9-33.1) | 0.467 |
| Prealbumin , mg/L | 134.87 ± 60.5 | 142.32 ± 62.83 | 0.950 |
| Scr, umol/L | 157.5 (77-382.75) | 153 (97-262) | 0.775 |
| 24h urine output, ml | 650 (24-1513) | 1070 (270-2350) | 0.288 |
| SOFA score | 8 (6-10) | 8 (7-11) | 0.388 |
| APACHE II score | 20 ± 5.64 | 21.06 ± 4.34 | 0.360 |
| ICU stay, days | 2 (1-10) | 3(1-11) | 0.690 |
| 28-day mortality, n (%) | 16 (50) | 29 (55.77) | 0.607 |

**Notes:** Continuous variables are expressed as the median (P25-P75) or mean±standard deviation (SD), and categorical variables are expressed as n (%). Statistical significance was set at *P* < 0.05.

**Abbreviations:** ARDS, acute respiratory distress syndrome; ALF, acute liver failure; AKI, acute kidney injury; APTT, Activated partial thromboplastin time; APACHE, acute physiology and chronic health evaluation; CRP, C-reactive protein; ICU, intensive care unit; MAP, mean arterial pressure; PCT, procalcitonin; PT, Prothrombin time; pro-BNP, pro-brain natriuretic peptide; PO2/FiO2, ratio of partial pressure of arterial oxygen to the fraction of inspired oxygen; TB, Total bilirubin; S-ARDS, sepsis-induced acute respiratory distress syndrome; S-ALF, sepsis-induced acute liver failure; S-AKI sepsis-induced acute kidney injury; Scr, Serum creatinine; SOFA, sequential organ failure assessment score; WBC, white blood cells.

**Supplementary Table 5** Demographic and Clinical Details of Non-ALF and S-ALF

| Parameters | Non-ALF  n,48 | S-ALF  n,36 | *P value* |
| --- | --- | --- | --- |
| Age, years | 56 (47-68) | 58.5 ( 42-63) | 0.701 |
| Male sex, n(%) | 37 (77.08) | 26 (72.22) | 0.611 |
| Arterial hypertension, n(%) | 18 (37.5) | 12 ( 33.33) | 0.693 |
| Diabetes mellitus, n(%) | 7 (14.58) | 3 (8.33) | 0.381 |
| Cerebrovascular disease, n(%) | 3 (6.25) | 2 ( 5.56) | 0.894 |
| Lung, n(%) | 31 (64.58) | 21 (58.33) | 0.559 |
| Abdominal, n(%) | 8 (16.67) | 10 ( 27.78) | 0.219 |
| Skin and soft tissue, n(%) | 3 (6.25) | 3 ( 8.33) | 0.714 |
| Other, n(%) | 2 (4.17) | 1 (2.78) | 0.734 |
| Use of mechanical ventilation, n(%) | 41 (85.42) | 26 ( 72.22) | 0.136 |
| PaO2/FiO2, mmHg | 220 (156-337) | 240 (163-350) | 0.755 |
| Mechanical ventilation duration, days | 3 (1-9) | 1.5 ( 0-6.25) | 0.125 |
| MAP, mmHg | 88.43±22.97 | 77.53±19.61 | 0.024 |
| Lactate, mmol/L | 1.94 (1.28-3.8) | 2.75 (1.74-4.84) | 0.017 |
| PCT, ng/ml | 4.32 (0.503-23.1) | 4.89 (1.405-20.95) | 0.697 |
| CRP, mg/L | 93.57 (31.27-145.7) | 92.31 (17.58-164.08) | 0.947 |
| WBC,10 12/L | 13.08±7.55 | 14.86±4.58 | 0.119 |
| Hemoglobin, g/L | 95.22±35.58 | 99.75±37.14 | 0.643 |
| Platelet, 109/L | 168.2 (42-268) | 192.1 ( 95.55-261.75) | 0.914 |
| proBNP, pg/ml | 3688 (732-11361) | 4864 ( 1258.75-26304.75) | 0.382 |
| PT, s | 12.8 (11.8-14.3) | 17.1 (13.1-21.9) | <0.001 |
| APTT, s | 31.5 (27.7-34.6) | 37 (30.9-43.7) | 0.002 |
| Fibrinogen, g/L | 4.51±1.48 | 3.67±1.96 | 0.029 |
| TB,umol/L | 14.3 (9.5-21.6) | 17.9 (10.4-84 ) | 0.038 |
| Albumin, g/L | 29.9 (26.9-33.3) | 32 (27.1-35.5) | 0.638 |
| Prealbumin , mg/L | 146.87±60.22 | 129.34±63.31 | 0.081 |
| Scr, umol/L | 134 ( 91-216 ) | 192 (111-482) | 0.112 |
| 24h urine output, ml | 1315 (700-2350) | 300 (0-1400) | 0.004 |
| SOFA score | 8 (6-10) | 9 (8-11.5) | 0.014 |
| APACHE II score | 20.07± 4.23 | 21.57±5.53 | 0.142 |
| ICU stay, days | 4 (1-11) | 3 (1-9) | 0.354 |
| 28-day mortality, n (%) | 23 (47.92) | 22 (61.11) | 0.230 |

**Notes:** Continuous variables are expressed as the median (P25-P75) or mean±standard deviation (SD), and categorical variables are expressed as n (%). Statistical significance was set at *P* < 0.05.

**Abbreviations:** ARDS, acute respiratory distress syndrome; ALF, acute liver failure; AKI, acute kidney injury; APTT, Activated partial thromboplastin time; APACHE, acute physiology and chronic health evaluation; CRP, C-reactive protein; ICU, intensive care unit; MAP, mean arterial pressure; PCT, procalcitonin; PT, Prothrombin time; pro-BNP, pro-brain natriuretic peptide; PO2/FiO2, ratio of partial pressure of arterial oxygen to the fraction of inspired oxygen; TB, Total bilirubin; S-ARDS, sepsis-induced acute respiratory distress syndrome; S-ALF, sepsis-induced acute liver failure; S-AKI sepsis-induced acute kidney injury; Scr, Serum creatinine; SOFA, sequential organ failure assessment score; WBC, white blood cells.

**Supplementary Table 6** Demographic and Clinical Details of Non-AKI and S-AKI

| Parameters | Non-AKI  n,33 | S-AKI  n,51 | *P value* |
| --- | --- | --- | --- |
| Age, years | 55 (48-67) | 59 (43-63) | 0.634 |
| Male sex, n(%) | 21 (63.64) | 42 (82.35) | 0.053 |
| Arterial hypertension, n(%) | 11 (33.33) | 19 (37.25) | 0.714 |
| Diabetes mellitus, n(%) | 6 (18.18) | 4 (7.84) | 0.153 |
| Cerebrovascular disease, n(%) | 3 (9.09) | 2 (3.93) | 0.328 |
| Lung, n(%) | 19 (57.58) | 33 (64.71) | 0.511 |
| Abdominal, n(%) | 5 (15.15) | 13 (25.50) | 0.259 |
| Skin and soft tissue, n(%) | 0 (0) | 6 (11.77) | 0.041 |
| Other, n(%) | 1 (3.03) | 2 (3.92) | 0.830 |
| Use of mechanical ventilation, n(%) | 30 (90.91) | 37 (72.55) | 0.041 |
| PaO2/FiO2, mmHg | 274.5 (183-356) | 218 (153-335) | 0.392 |
| Mechanical ventilation duration, days | 3.5 (1-8) | 2 (0.5-7.5) | 0.113 |
| MAP, mmHg | 85.74±23.11 | 82.56±21.61 | 0.306 |
| Lactate, mmol/L | 2.1 (1.33-3) | 2.22 (1.47-4.58) | 0.081 |
| PCT, ng/ml | 1.81 (0.40-8.99) | 10.9 (1.74-52.35) | 0.001 |
| CRP, mg/L | 79.36 (17.72-131.59) | 102.29 (32.2-171.8) | 0.090 |
| WBC,10 12/L | 14.64±5.67 | 13.17±7.12 | 0.508 |
| Hemoglobin, g/L | 101.56±35.82 | 93.60±36.27 | 0.262 |
| Platelet, 109/L | 195.5 (125.65-288) | 142 (35-253.5) | 0.035 |
| proBNP, pg/ml | 3498 (458-13204) | 4012 (1367-23642.5) | 0.379 |
| PT, s | 13 (11.88-15.05 ) | 14.5 (12.5-19.15) | 0.056 |
| APTT, s | 32.35 (28.48-35.98) | 33.5 (28.48-35.98) | 0.248 |
| Fibrinogen, g/L | 4.12±1.50 | 4.20±1.92 | 0.649 |
| TB,umol/L | 15 (8.15-21.475) | 16.3 (10.55-51.75) | 0.303 |
| Albumin, g/L | 31.45 (27.65-36.28) | 29.7 (26.70-32.95) | 0.099 |
| Prealbumin , mg/L | 144.85±66.82 | 135.62±57.9 | 0.296 |
| Scr, umol/L | 93.5 (66-126.75) | 262 (167.5-512) | <0.001 |
| 24h urine output, ml | 1630 (700-2815) | 425 (32.5-1425) | <0.001 |
| SOFA score | 8 (7-10) | 8 (7-11) | 0.055 |
| APACHE II score | 20.09±4.31 | 21.15±5.21 | 0.253 |
| ICU stay, days | 5.5 (1-12) | 2 (1-10) | 0.039 |
| 28-day mortality, n (%) | 18 (54.55) | 27 (52.94) | 0.886 |

**Notes:** Continuous variables are expressed as the median (P25-P75) or mean±standard deviation (SD), and categorical variables are expressed as n (%). Statistical significance was set at *P* < 0.05.

**Abbreviations:** ARDS, acute respiratory distress syndrome; ALF, acute liver failure; AKI, acute kidney injury; APTT, Activated partial thromboplastin time; APACHE, acute physiology and chronic health evaluation; CRP, C-reactive protein; ICU, intensive care unit; MAP, mean arterial pressure; PCT, procalcitonin; PT, Prothrombin time; pro-BNP, pro-brain natriuretic peptide; PO2/FiO2, ratio of partial pressure of arterial oxygen to the fraction of inspired oxygen; TB, Total bilirubin; S-ARDS, sepsis-induced acute respiratory distress syndrome; S-ALF, sepsis-induced acute liver failure; S-AKI sepsis-induced acute kidney injury; Scr, Serum creatinine; SOFA, sequential organ failure assessment score; WBC, white blood cells.

**Supplementary Table 7** Demographic and Clinical Details of Survivors and Non-survivors

| Parameters | Survivors  n,39 | Non-survivors  n,45 | *P value* |
| --- | --- | --- | --- |
| Age, years | 59 (46-63) | 55 (46-67) | 0.805 |
| Male sex, n(%) | 28 (71.79) | 35 (77.78) | 0.528 |
| Arterial hypertension, n(%) | 14 (35.9) | 16 (35.56) | 0.974 |
| Diabetes mellitus, n(%) | 4 (10.26) | 6 (13.33) | 0.664 |
| Cerebrovascular disease, n(%) | 2 (5.13) | 3 (6.67) | 0.766 |
| Lung, n(%) | 23 (58.97) | 29 (64.44) | 0.607 |
| Abdominal, n(%) | 10 (25.64) | 8 (17.78) | 0.381 |
| Skin and soft tissue, n(%) | 2 (5.13) | 4 (8.89) | 0.504 |
| Other, n(%) | 2 (5.13) | 1 (2.22) | 0.474 |
| Use of mechanical ventilation, n(%) | 33 (84.62) | 34 (75.56) | 0.303 |
| PaO2/FiO2, mmHg | 236 (178.75-370) | 205 (139-336) | 0.307 |
| Mechanical ventilation duration, days | 4 (1-10) | 1 (1-6.5) | 0.030 |
| MAP, mmHg | 83.32±19.19 | 84.57±25 | 0.572 |
| Lactate, mmol/L | 1.77 (1.31-2.88) | 3 (1.75-4.58) | 0.001 |
| PCT, ng/ml | 4.36 (1.40-23.85) | 5.38 (1.09-20.8) | 0.982 |
| CRP, mg/L | 91.11 (25.89-145.41) | 93.57 (27.77-164.41) | 0.660 |
| WBC,10 12/L | 13.47±6.89 | 14.15±6.22 | 0.345 |
| Hemoglobin, g/L | 94.47±36.68 | 99.63±35.73 | 0.299 |
| Platelet, 109/L | 213 (84.75-285) | 143 (41-220.4) | 0.037 |
| proBNP, pg/ml | 4303 (1132.25-22307) | 3537 (809-14214.5) | 0.469 |
| PT, s | 13.6 (11.90-17.23) | 13.6 (12.15-16.6) | 0.306 |
| APTT, s | 32 (27.825-36) | 34.5 (29.4-39.3) | 0.037 |
| Fibrinogen, g/L | 4.15±1.52 | 4.17±1.94 | 0.837 |
| TB,umol/L | 15.8 (10.95-30.55) | 15.5 (9.4-25.45) | 0.893 |
| Albumin, g/L | 29.9 (25.75-35.73) | 30.6 (27.3-33.05) | 0.819 |
| Prealbumin , mg/L | 144.49±66.48 | 134.97±57.16 | 0.253 |
| Scr, umol/L | 180.5 (92.5-427.8) | 132 (88-231) | 0.394 |
| 24h urine output, ml | 800 ( 207.5-1725.5) | 880 (304-2000) | 0.836 |
| SOFA score | 7 ( 6-8) | 10 (10-11.5) | <0.001 |
| APACHE II score | 16.92±3.467 | 24.35±2.638 | <0.001 |
| ICU stay, days | 6 (1-12) | 2 (1-7.5) | 0.007 |

**Notes:** Continuous variables are expressed as the median (P25-P75) or mean±standard deviation (SD), and categorical variables are expressed as n (%). Statistical significance was set at *P* < 0.05.

**Abbreviations:** APTT, Activated partial thromboplastin time; APACHE, acute physiology and chronic health evaluation; CRP, C-reactive protein; ICU, intensive care unit; MAP, mean arterial pressure; PCT, procalcitonin; PT, Prothrombin time; pro-BNP, pro-brain natriuretic peptide; PO2/FiO2, ratio of partial pressure of arterial oxygen to the fraction of inspired oxygen; TB, Total bilirubin; Scr, Serum creatinine; SOFA, sequential organ failure assessment score; WBC, white blood cells.


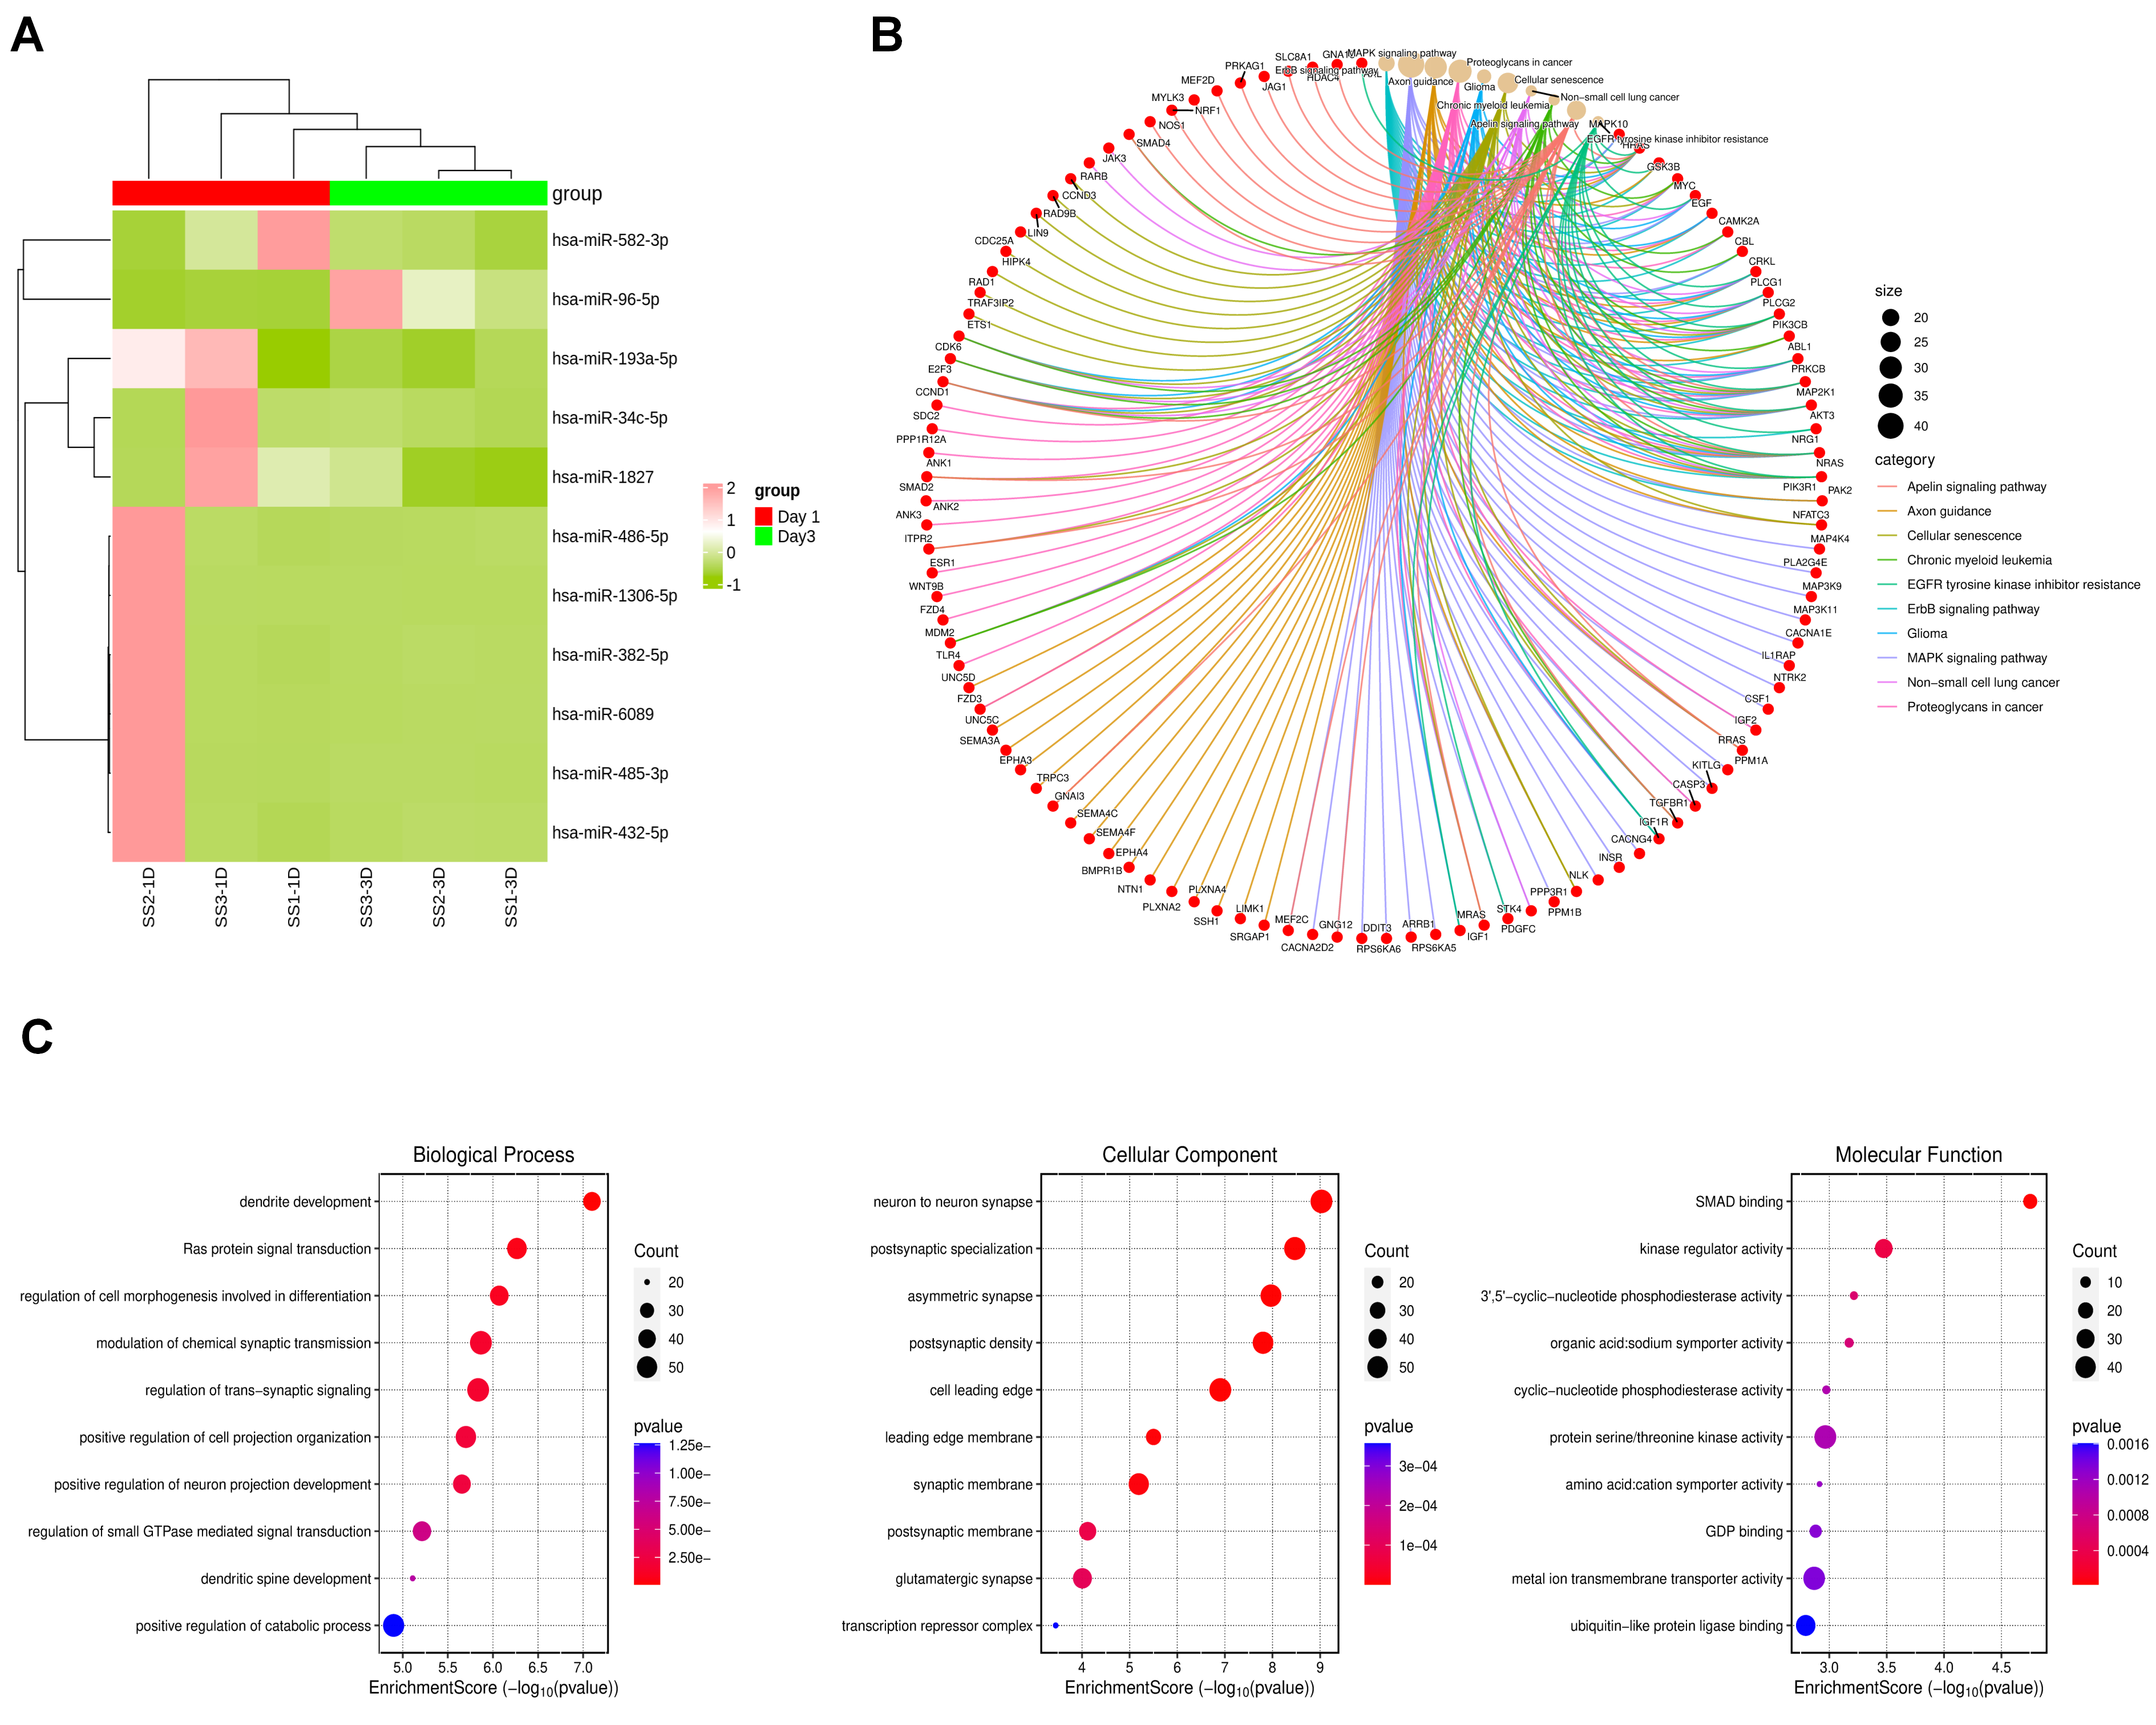


**Figure S1.** RNA analysis of PMN-EVs from patients with septic shock on ICU admission (day 1) and day 3. **(A)** Heatmap display showing 11 DE-miRNAs in patients with septic shock at day 1 and day 3. **(B)** KEGG pathway enrichment analyses were used to assess the potential functions of these 11 DE-miRNAs based on their target genes. **(C)** GO annotation was performed for DE-miRNAs, with a focus on analyzing their involvement in biological processes, cellular components, and molecular functions.


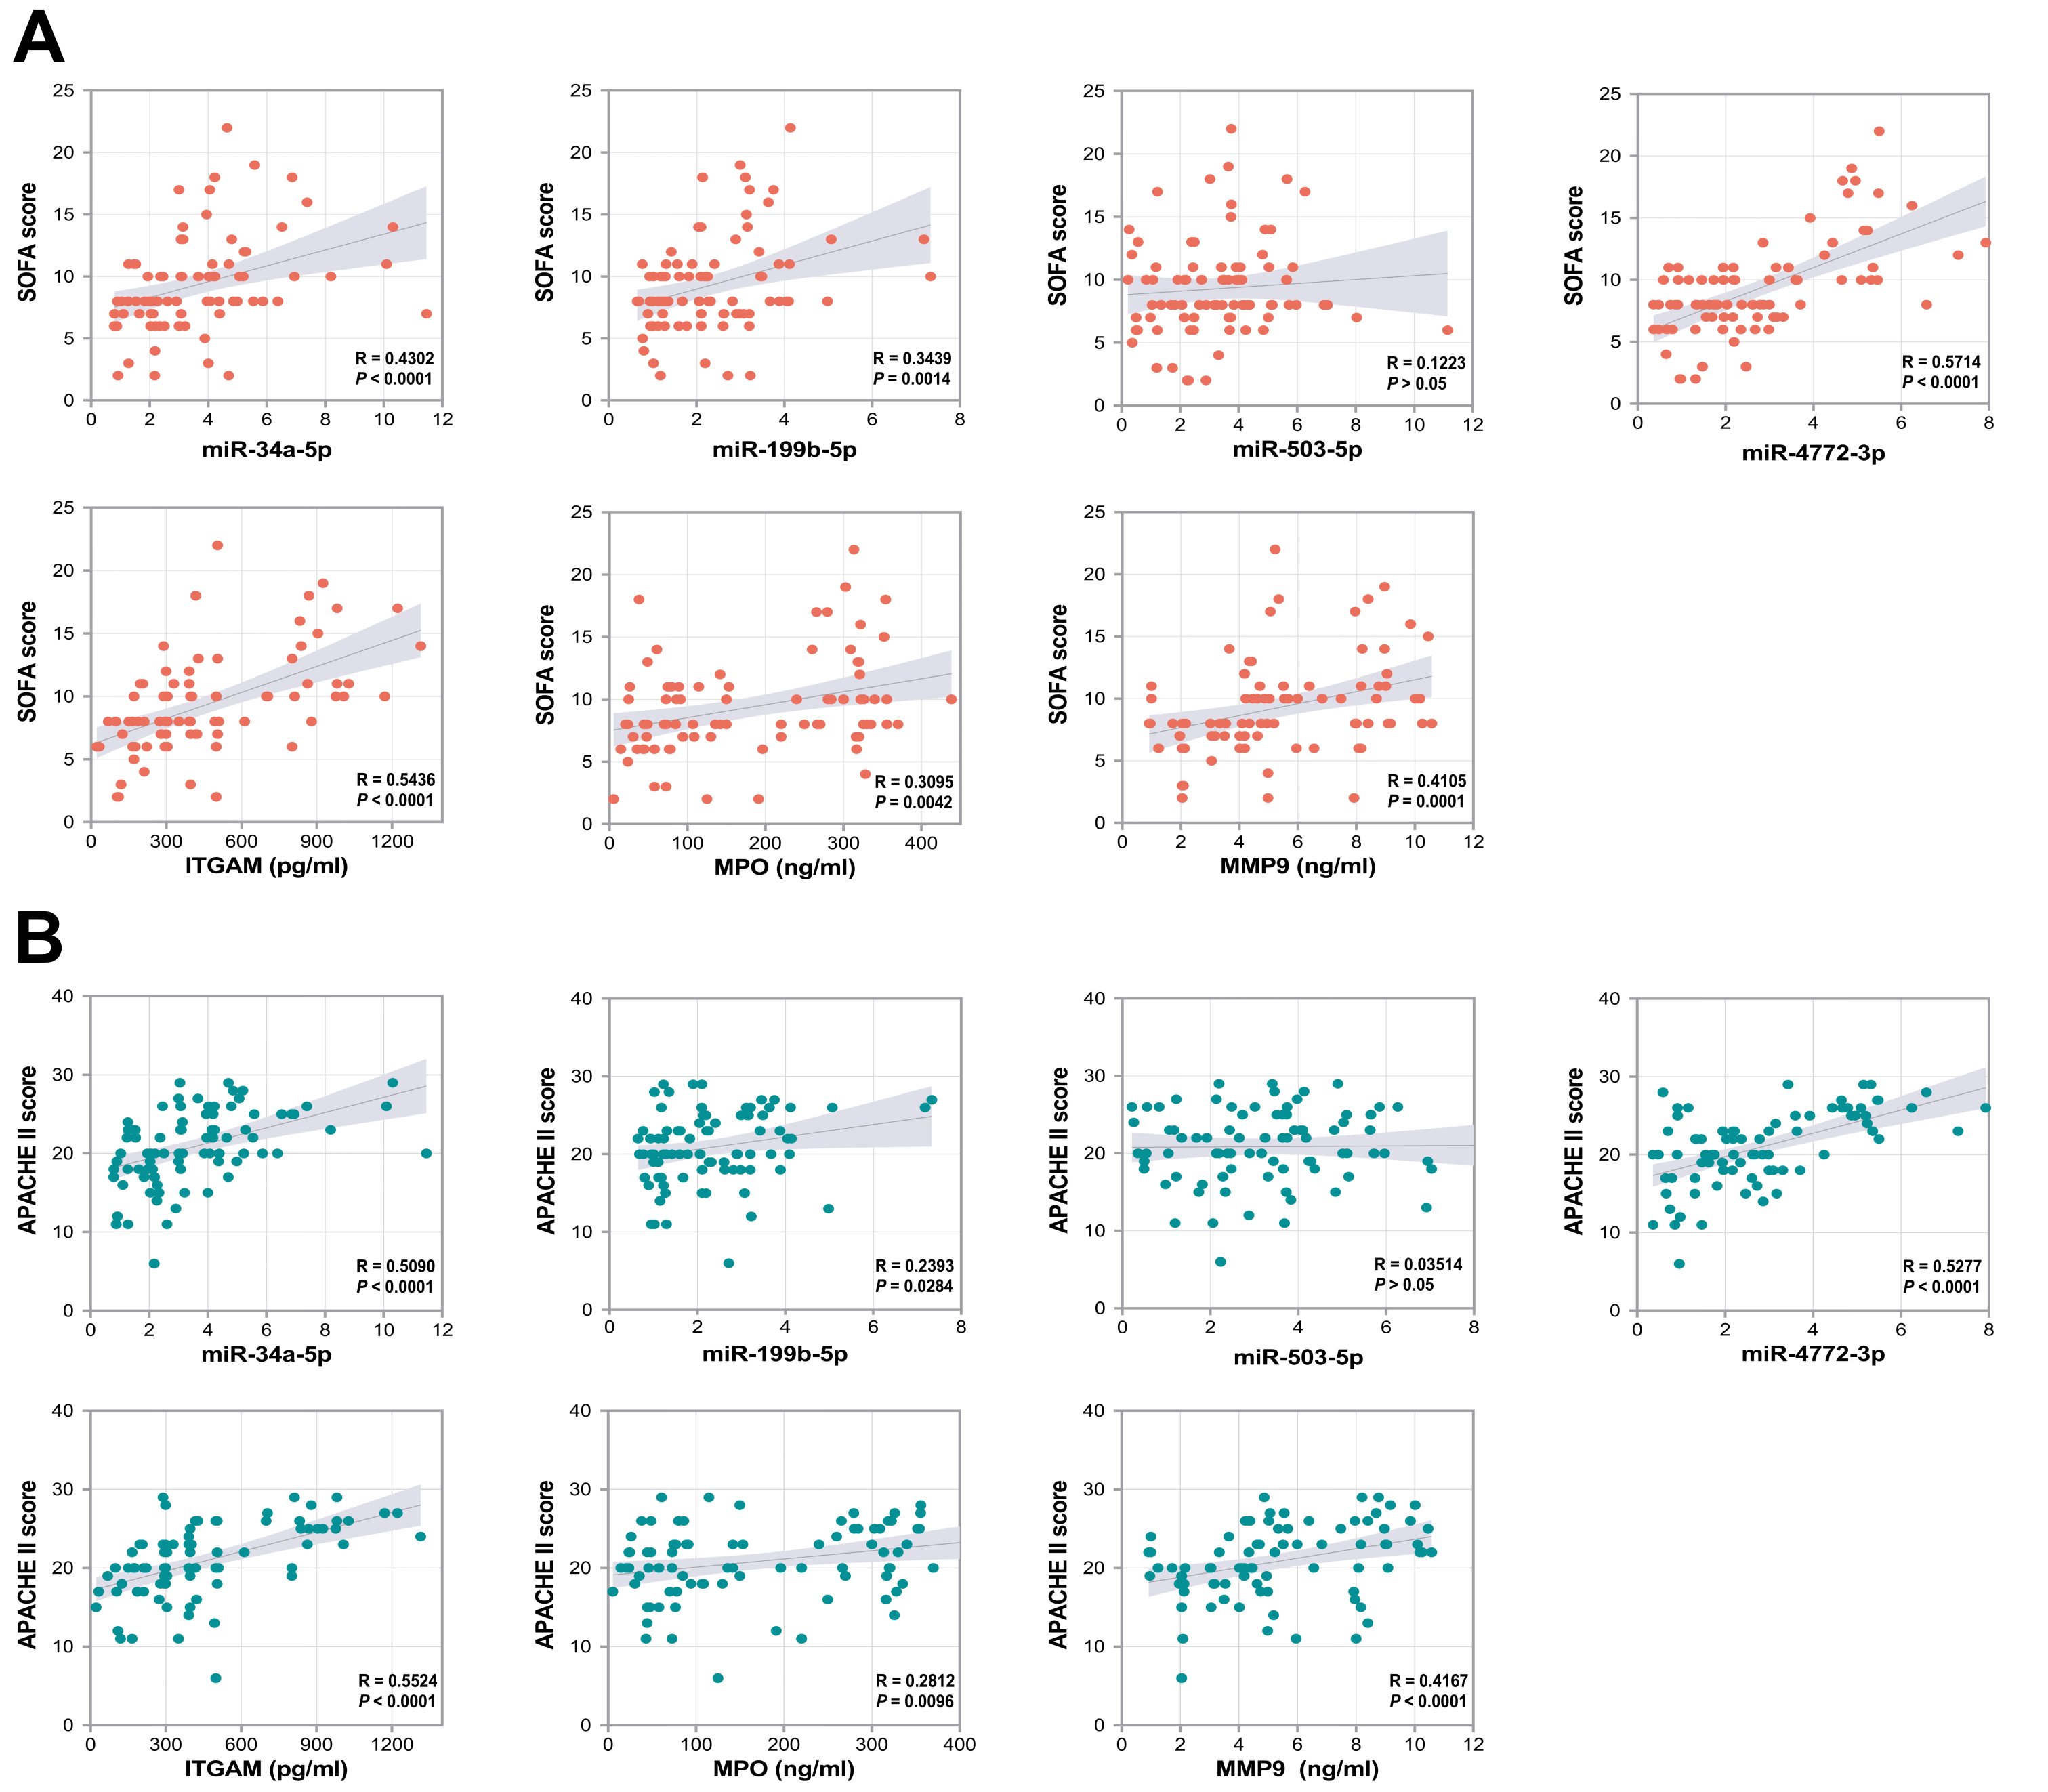


**Figure S2.** Spearman correlation analysis of miR-34a-5p, miR-199b-5p, miR-503-5p, miR-4772-3p, ITGAM, MPO, and MMP9 with **(A)** SOFA score and **(B)** APACHE II score in septic patients. Statistical significance was set at *P* < 0.05.


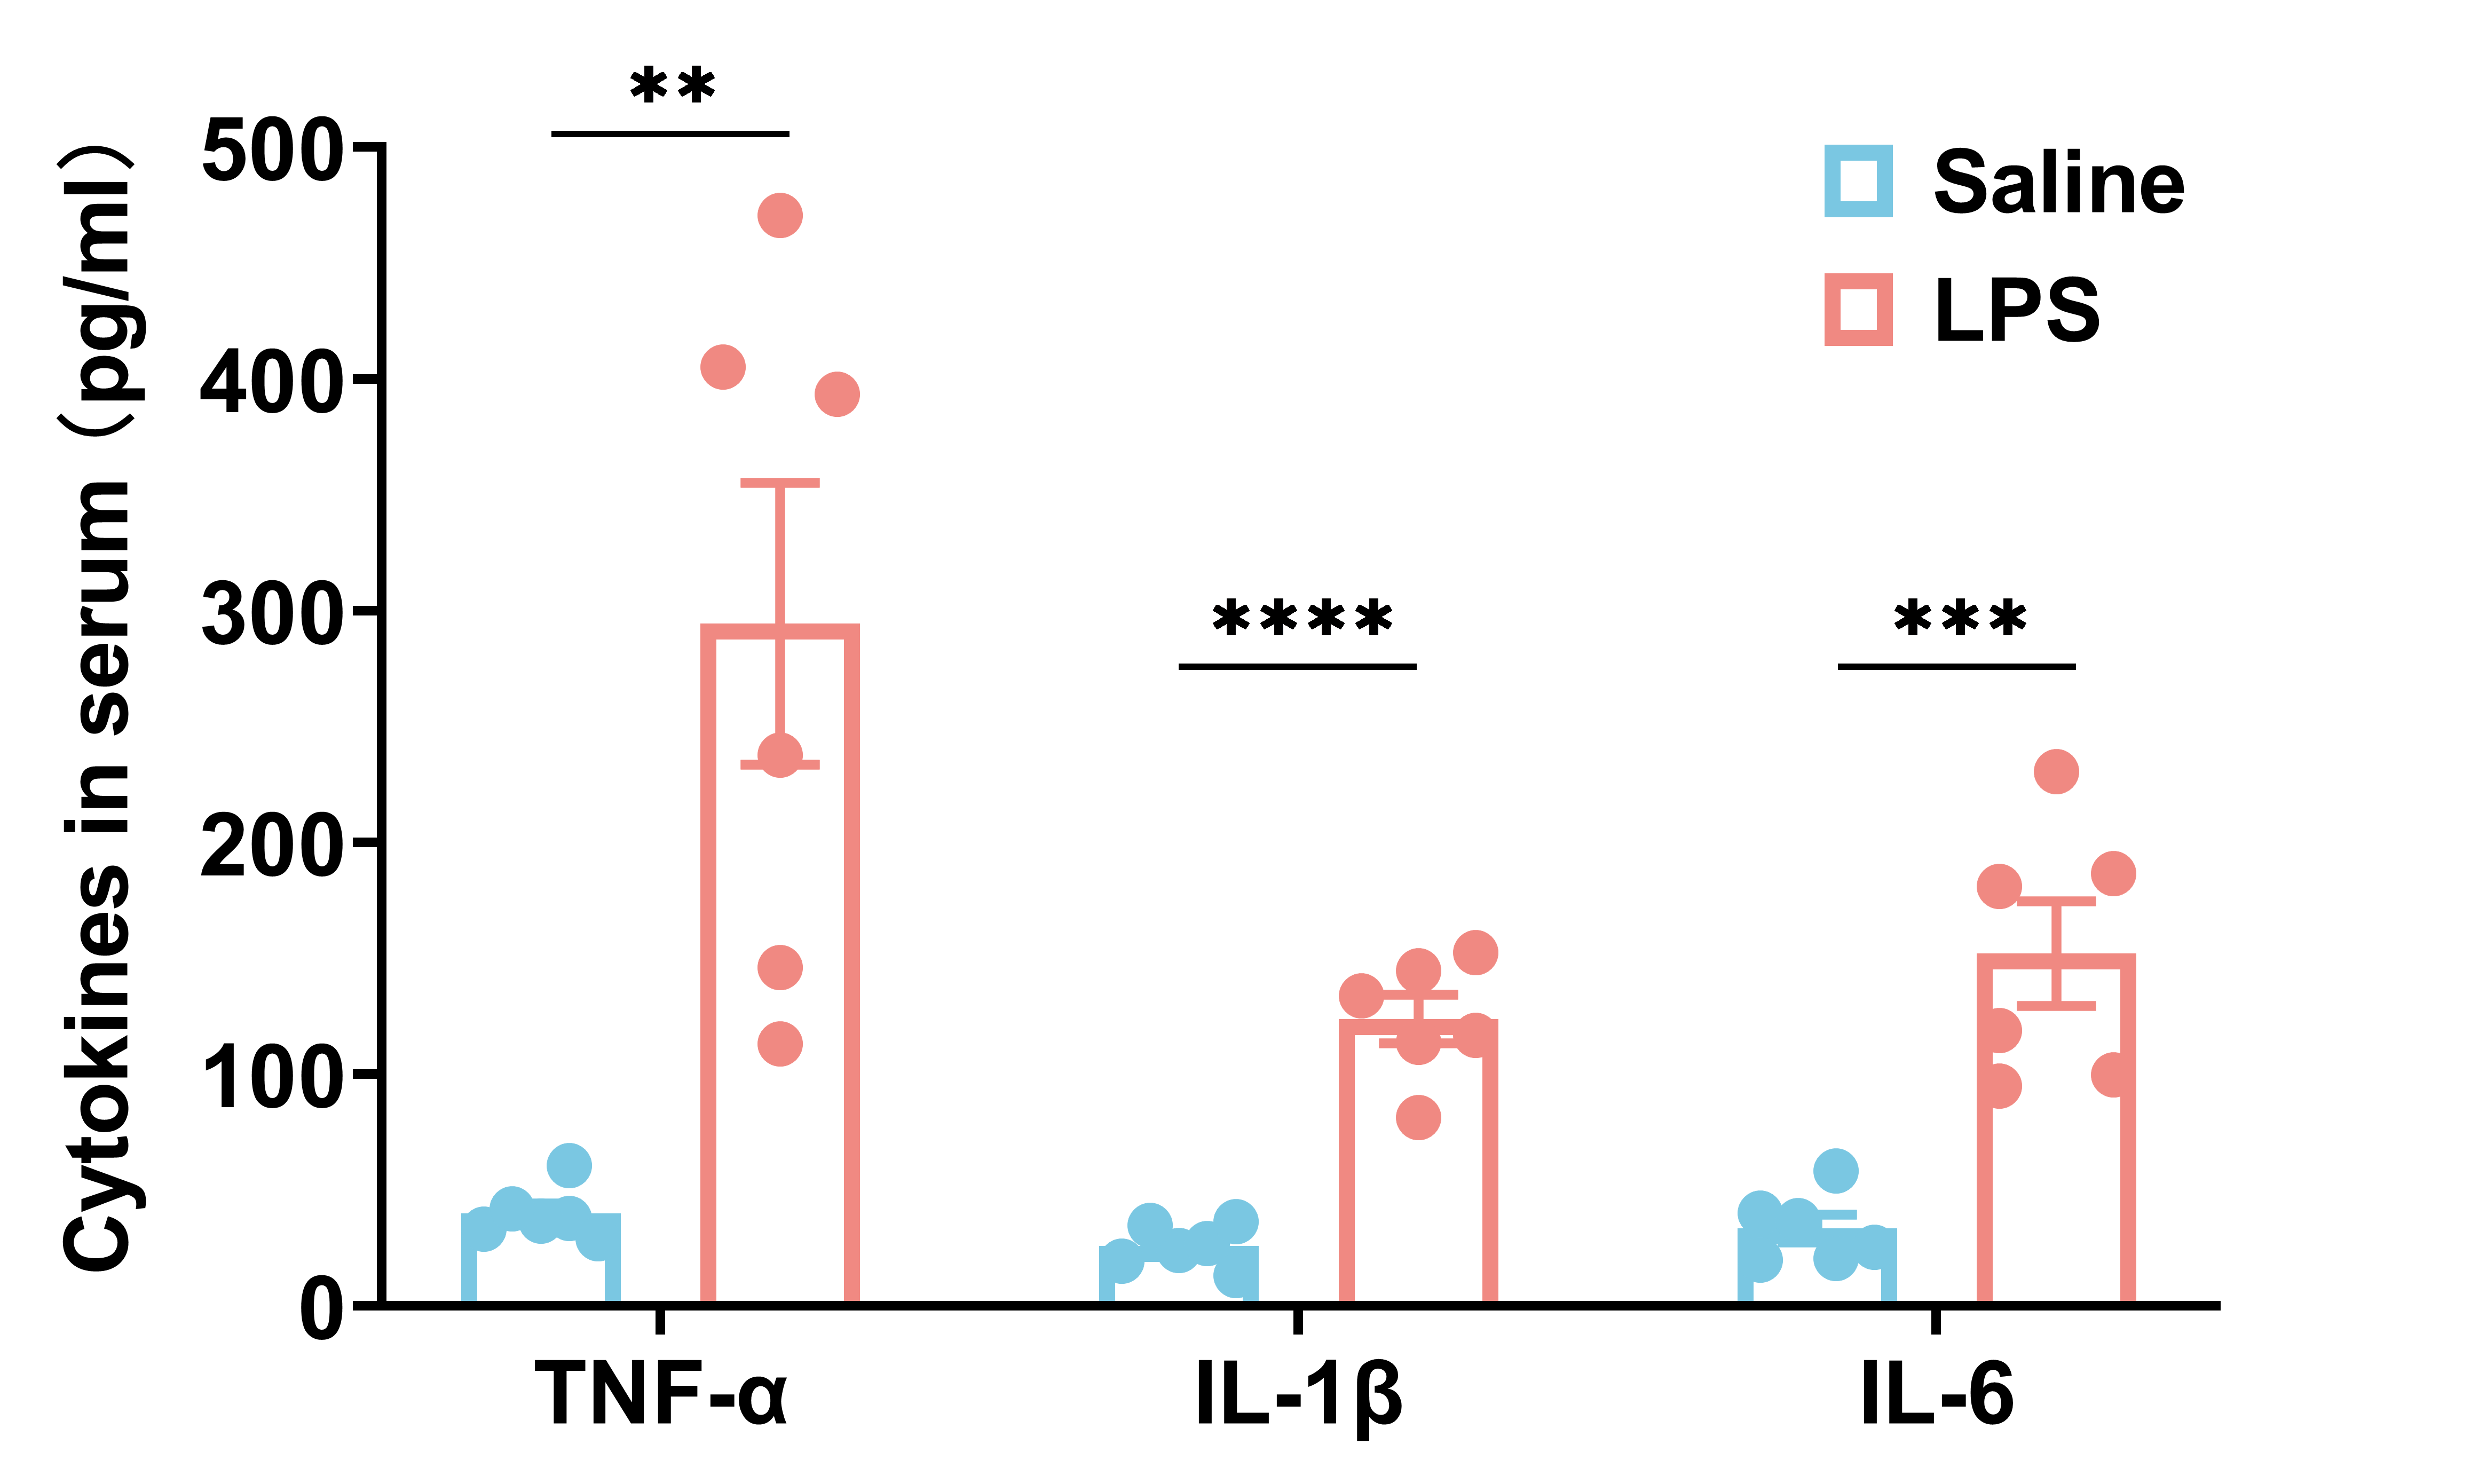


**Figure S3. LPS-induced sepsis model in vivo.** An experimental sepsis model was induced in rats by intraperitoneal injection of 10 mg/kg endotoxin lipopolysaccharides (LPS). These rats were sacrificed 24 hours after LPS administration for the following experiments. The concentrations of IL-1β, IL-6, and TNF-α in serum were measured by ELISA. Data are presented as the mean ± SEM. ***p* < 0.01, ****p* < 0.001,*****p* < 0.0001.
